# Supplementary material for: Leeches Baicalobdella torquata feed on hemolymph but have a low effect on the cellular immune response of amphipod Eulimnogammarus verrucosus from Lake Baikal
Source: PeerJ. 2024 May 17;12:e17348. doi: 10.7717/peerj.17348 (PMC11104339; doi:10.7717/peerj.17348)
Supplement: Supplemental Information 1 [file peerj-12-17348-s001.xlsx]

## Sheet: Figure 5
Figure 5 (a)	Total hemocyte count, cells per µL
October 2022		February 2023		April 2023
Without leech	With leech	Without leech	With leech	Without leech	With leech
1625	328	1313.89	877.778	995.833	1668.75
678	414	1338.89	2122.22	2806.52	337.5
2322	850	1125	2372.22	1891.3	99.4444
538	838	1194.44	1975	1877.78	1020.37
1416	819	777.778	2958.33	1283.33	725
559	342	3211.11		2638.89	2930.77
381	192	1830.56		3175	2055.56
		1891.67		1250	2108.33
		1386.11		2633.33	3377.78
		1125		1398.15	1319.44
		1913.89
Figure 5 (b)
Size of leeches in the middle of the body, mm
October 2022	February 2023	April 2023
0.549	1.47974	1.87517
0.852	2.32345	1.52
0.990969	2.22668	1.65167
1.43171	1.95333	0.717251
1.42854	1.68422	1.08652
0.949297	1.64396	0.835026
	2.08965	1.07834
	1.26997	0.706144
	1.61924	1.49586
	1.32188	1.26192
	2.1843	1.14196
	2.24964	0.899154
		1.14375
		1.66617
		1.09479
		1.00128
		0.848075
		0.955717
		0.865514
		0.825115
Figure 5 (d)	Total hemocyte count, cells per µL
October 2022		February 2023			April 2023
Size of leeches in the middle of the body, mm	Hemocyte count per 1 µL	Summarized width of all leeches infecting the animal, mm	Size of leeches in the middle of the body, mm	Hemocyte count per 1 µL	Summarized width of all leeches infecting the animal, mm	Size of leeches in the middle of the body, mm	Hemocyte count per 1 µL
0.549	414	7.9832	1.47974	877.778	1.87517	1.87517	1668.75
0.852	850		2.32345		3.17167	1.52	337.5
0.990969	838		2.22668			1.65167
1.43171	819		1.95333		3.71714	0.717251	99.4444
1.42854	342	5.41784	1.68422	2372.22		1.08652
0.949297	192		1.64396			0.835026
			2.08965			1.07834
		4.21109	1.26997	1975	0.706144	0.706144	1020.37
			1.61924		2.75778	1.49586	725
			1.32188			1.26192
		4.43394	2.1843	2958.33	2.04111	1.14196	2930.77
			2.24964			0.899154
					3.9047	1.14375	2055.56
						1.66617
						1.09479
					2.80507	1.00128	2108.33
						0.848075
						0.955717
					1.69063	0.865514	3377.78
						0.825115
Figure5 (e)
Phenoloxidase activity, a.u.
Leech-free	Leech-infected
0.146333	0.0386667
0.0386667	0.0913333
0.0363333	0.118
0.032	0.0776667
0.0933333	0.0816667
0.0126667	0.0166667
0.101	0.0153333
0.038	0.0473333
0.015
0.0993333
Figure5 (f)
Glycogene concentration, µmol/g
Leech-free	Leech-infected
16.8196	2.61494
9.91096	13.4944
7.42515	19.7251
7.78026	3.58344
5.3913	21.3392
33.0258	1.93699
19.2085	6.10153
28.7321	16.8196
17.6912	31.9281
10.0016

## Sheet: Figure 6
Figure 6 (a)	Intensity of the cellular immune response of hemocytes extracted in primary culture from leech-free and leech-infected amphipods E. verrucosus
Leech-infected				Leech-free
Partially encapsulated	Fully encapsulated	Beads count	Count of hemocytes per well	Partially encapsulated	Fully encapsulated	Beads count	Count of hemocytes per well
65.8031	9.92366	386	52333.3	82.1429	6.9869	392	59666.7
92.5373	6.19469	134	52333.3	92.9134	6.95187	127	59666.7
94.9458	1.33333	277	52333.3	84.6154	9.44882	104	59666.7
97.2477	9.45274	109	52333.3
88.0503	4.18118	159	52333.3
89.5911	6.73077	269	100800	88.1226	8.18182	261	95400
80.0738	2.33161	271	100800	92.2794	9.90991	272	95400
88.5135	2.98507	296	100800	90.8759	7.63359	274	95400
89.0625	5.77617	192	157778	92.9825	4.91803	228	154907
93.6275	4.58716	204	157778	87.7451	8.05369	204	154907
94.0367	11.9497	218	157778	92.1739	7.27969	230	154907
94.6078		204	157778	93.7799	12.1324	209	154907
93.1034		203	157778	93.5644	15.3285	202	154907
96.4602		226	147407
98.7234		235	147407

## Sheet: Figure 7
Figure 7 (a, b)
Total hemocyte count				Granulocyte percentage
Without injection of saline buffer	1.5 hours	1 day	3 day	Without injection of saline buffer	1.5 hours	1 day	3 day
11916.3	5260.67	3543.29	1493.25	35.8	38.5	21.6	44.2
7428.44	4000.18	836.409	938.074	35.1	41.2	45.6	36.9
1147.07	1579.66	1727.09	4682.27	22.9	35.6	51.6	32.1
2718.63	108.551	4277.23	7468.95	48.8	65.1	32.6	38.7
543.366	6179.3	1733.57	5735.37	37.2	42.6	50	28.9
2196.94	745.275	1563.46	13641.8	43.9	52.6	40
333.753	620.522	1691.45	5012.78	37.9
	2926.01	1921.51		35.5
Figure 7 (c, d)
Total hemocyte count					Granulocyte percentage
THC	Time	Leech	Bacteria		GP	Time	Leech	Bacteria
5120	1.5	f	f		35.8	1.5	f	f
3240	1.5	f	f		35.1	1.5	f	f
1540	1.5	f	f		22.9	1.5	f	f
2300	1.5	f	f		48.8	1.5	f	f
6480	1.5	f	f		37.2	1.5	f	f
8400	1.5	f	f		43.9	1.5	f	f
3100	1.5	f	f		37.9	1.5	f	f
1800	1.5	f	t		35.5	1.5	f	f
2360	1.5	f	t		64.1	1.5	f	t
1680	1.5	f	t		52.4	1.5	f	t
260	1.5	f	t		51.4	1.5	f	t
2480	1.5	f	t		33.4	1.5	f	t
1640	1.5	f	t		55.6	1.5	f	t
1460	1.5	f	t		51.6	1.5	f	t
2060	1.5	f	t		48.2	1.5	f	t
3400	1.5	t	f		56.5	1.5	f	t
4400	1.5	t	f		39.8	1.5	t	f
1540	1.5	t	f		50	1.5	t	f
480	1.5	t	f		41.5	1.5	t	f
4640	1.5	t	f		55.5	1.5	t	f
5480	1.5	t	f		47.2	1.5	t	f
2320	1.5	t	f		47.6	1.5	t	f
1300	1.5	t	t		22.2	1.5	t	f
1880	1.5	t	t		45.1	1.5	t	t
1720	1.5	t	t		41.2	1.5	t	t
1340	1.5	t	t		41.8	1.5	t	t
3820	1.5	t	t		51.2	1.5	t	t
2000	1.5	t	t		48.2	1.5	t	t
3020	1.5	t	t		47.5	1.5	t	t
2160	1.5	t	t		43.7	1.5	t	t
6400	24	f	f		66.7	1.5	t	t
3540	24	f	f		50	24	f	f
3800	24	f	f		34.6	24	f	f
4580	24	f	f		36.1	24	f	f
7580	24	f	f		38.6	24	f	f
5580	24	f	f		39.6	24	f	f
5120	24	f	f		32.7	24	f	f
3560	24	f	f		48.5	24	f	f
4420	24	f	t		34.5	24	f	f
1300	24	f	t		66.3	24	f	t
760	24	f	t		51.2	24	f	t
3720	24	f	t		51.4	24	f	t
4080	24	f	t		63.9	24	f	t
1000	24	f	t		46.2	24	f	t
760	24	f	t		43.4	24	f	t
11560	24	t	f		44.75	24	t	f
7280	24	t	f		33.15	24	t	f
3400	24	t	f		41.4	24	t	f
4480	24	t	f		25	24	t	f
5740	24	t	f		44.6	24	t	f
5540	24	t	f		41	24	t	f
6940	24	t	f		34.7	24	t	f
4220	24	t	t		44.7	24	t	t
5740	24	t	t		46.1	24	t	t
1220	24	t	t		30.9	24	t	t
2520	24	t	t		43.5	24	t	t
1120	24	t	t		52.6	24	t	t
1160	24	t	t		43.3	24	t	t
1620	24	t	t		39	24	t	t
3560	72	f	f		31.1	72	f	f
3520	72	f	f		36.2	72	f	f
6080	72	f	f		50	72	f	f
2100	72	f	f		27.4	72	f	f
2360	72	f	f		42.1	72	f	f
2820	72	f	f		32.9	72	f	f
2760	72	f	f		32.6	72	f	f
4940	72	f	f		16.5	72	f	f
780	72	f	t		23.1	72	f	t
2140	72	f	t		29.7	72	f	t
540	72	f	t		43.4	72	f	t
1320	72	f	t		37.7	72	f	t
2160	72	f	t		23.4	72	f	t
940	72	f	t		24	72	f	t
1780	72	f	t		31.5	72	f	t
1360	72	f	t		33.4	72	f	t
2640	72	f	t		41.2	72	f	t
1140	72	f	t		23.9	72	t	f
3880	72	f	t		33.7	72	t	f
1640	72	f	t		37.6	72	t	f
2720	72	f	t		36.1	72	t	f
4740	72	t	f		24.2	72	t	f
3520	72	t	f		38.9	72	t	f
7100	72	t	f		38.5	72	t	f
7180	72	t	f		20.7	72	t	f
2480	72	t	f		42	72	t	t
4980	72	t	f		38.7	72	t	t
6460	72	t	f		37.7	72	t	t
5660	72	t	f		47.1	72	t	t
10420	72	t	t		41.2	72	t	t
3840	72	t	t		32.1	72	t	t
4100	72	t	t		50	72	t	t
3000	72	t	t		42.3	72	t	t
2020	72	t	t
3680	72	t	t
1060	72	t	t
3200	72	t	t
